# Supplementary material
Source: publisher figshare collection journal article supplement (https://acs.figshare.com/ndownloader/files/7406164)
Supplement: Supplementary file 1 [file 7406164]

# **Ag<sub>50</sub>(Dppm)<sub>6</sub>(SR)<sub>30</sub> and its homolog**

## **Au<sub>x</sub>Ag<sub>50-x</sub>(Dppm)<sub>6</sub>(SR)<sub>30</sub> alloy nanocluster: Seeded**

## **Growth, Structure Determination and Differences of**

## **Properties**

Wenjun Du,<sup>†,‡</sup> Shan Jin,<sup>†,‡</sup> Lin Xiong,<sup>‡</sup> Man Chen,<sup>†</sup> Jun Zhang,<sup>§</sup> Xuejuan Zou,<sup>†</sup> Yong Pei,<sup>‡</sup> Shuxin Wang,<sup>\*,†</sup> and Manzhou Zhu<sup>\*,†</sup>

<sup>†</sup>Department of Chemistry and Center for Atomic Engineering of Advanced Materials, Anhui University, Hefei, Anhui 230601, People's Republic of China

<sup>‡</sup>Department of Chemistry, Key Laboratory of Environmentally Friendly Chemistry and Applications of Ministry of Education, Xiangtan University, Xiangtan, Hunan 411105, People's Republic of China

<sup>§</sup>School of Materials and Chemical Engineering, Anhui Jianzhu University, Hefei, Anhui 230601, People's Republic of China

### **Supporting information:**

**Crystal data for Ag<sub>50</sub>(Dppm)<sub>6</sub>(SR)<sub>30</sub> nanocluster.** Space group  $P\bar{1}$ ,  $a = 26.2512(12)$  Å,  $b = 26.6936(12)$  Å,  $c = 26.7376(12)$  Å,  $\alpha = 76.576(2)^\circ$ ,  $\beta = 60.718(2)^\circ$ ,  $\gamma = 61.726(2)^\circ$ ,  $V = 14392.3(12)$  Å<sup>3</sup>,  $T = 150(2)$  K,  $Z = 1$ , 206755 reflections measured, 53140 unique reflections ( $R_{\text{int}}=0.0596$ ), final  $R_1 = 0.0619$  and  $wR_2 = 0.1606$  for ( $I > 2\sigma(I)$ ).

**Crystal data for Ag<sub>x</sub>Au<sub>50-x</sub>(Dppm)<sub>6</sub>(SR)<sub>30</sub> nanocluster.** Space group  $P\bar{1}$ ,  $a = 25.8780(9)$  Å,  $b = 26.0327(9)$  Å,  $c = 26.5129(9)$  Å,  $\alpha = 61.613(2)^\circ$ ,  $\beta = 75.949(2)^\circ$ ,  $\gamma = 61.416(2)^\circ$ ,  $V = 13795.5(8)$  Å<sup>3</sup>,  $T = 150(2)$  K,  $Z = 1$ , 183433 reflections measured, 50714 unique reflections ( $R_{\text{int}}=0.0731$ ), final  $R_1 = 0.1497$  and  $wR_2 = 0.3478$  for ( $I > 2\sigma(I)$ ).

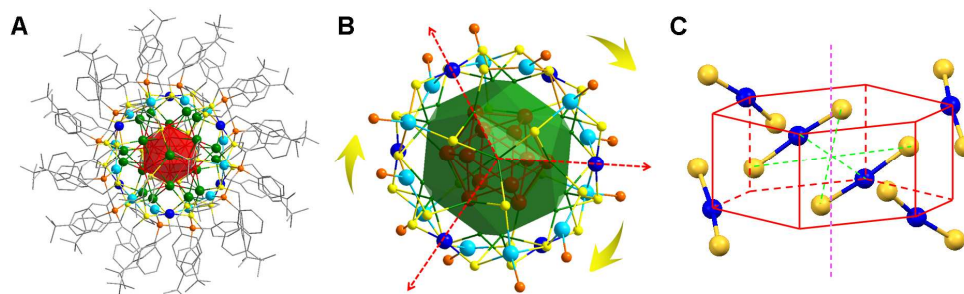

**Figure S1.** (A) the total structure of the  $M_{5.34}Ag_{44.66}(Dppm)_6(SR)_{30}$  ( $M=Au/Ag$ ) nanocluster.; (B) the trigonal axis ( $C_3$ ) of  $M_{5.34}Ag_{44.66}(Dppm)_6(SR)_{30}$  ( $M=Au/Ag$ ) nanocluster; (C) the arrangement of the six "S-Ag-S" staples formed a hexagonal prism, and made the  $M_{5.34}Ag_{44.66}(Dppm)_6(SR)_{30}$  ( $M=Au/Ag$ ) nanocluster a  $S_6/C_{3i}$  point group.(color labels: red/green/blue/sky blue=Ag; yellow=S; orange=P; gray=C)

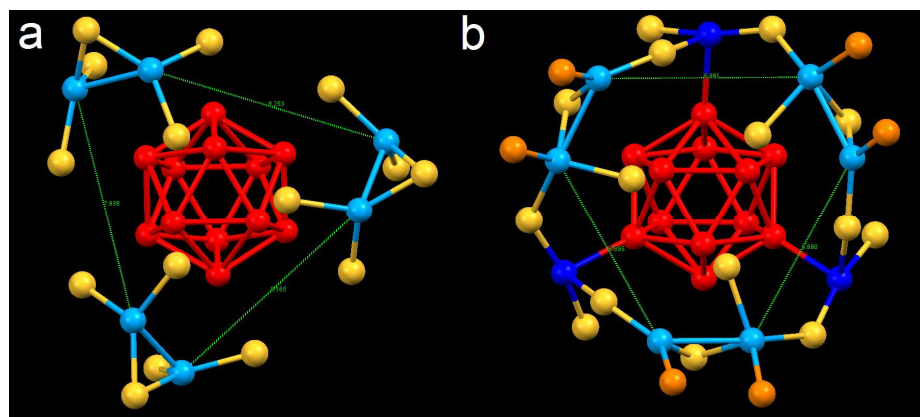

**Figure S2.** The comparison of the structures of different surface staple units between  $Ag_{44}(SR)_{30}^{4-}$  and  $Ag_{50}(Dppm)_6(SR)_{30}$  (color labels: red/blue/sky blue=Ag; yellow=S; orange=P)

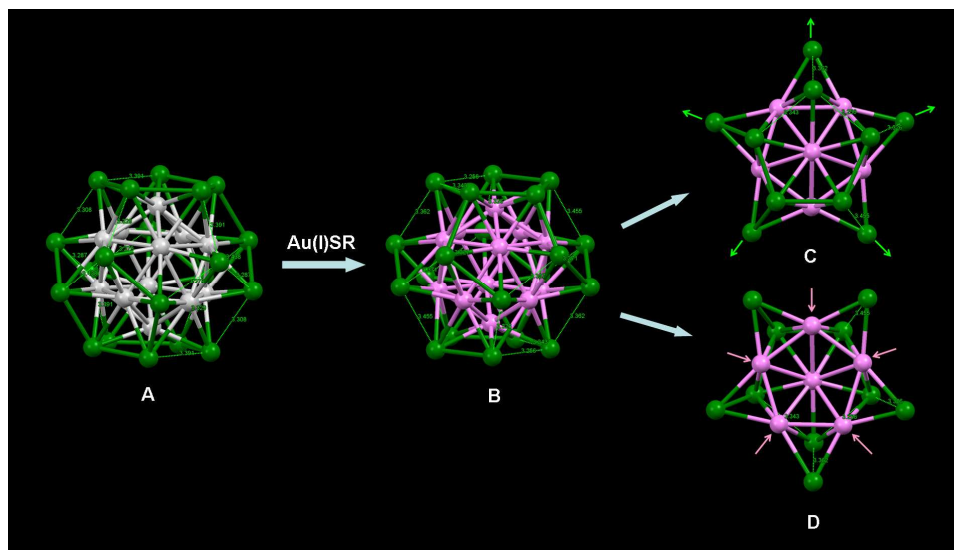

**Figure S3.** The  $\text{M}_{32}$  kernel structure of (A) the  $\text{Ag}_{50}(\text{Dppm})_6(\text{SR})_{30}$  and (B) the  $\text{Au}_{5.34}\text{Ag}_{44.66}(\text{Dppm})_6(\text{SR})_{30}$ . (C) The top view of the half of the  $\text{M}_{32}$  kernel of the  $\text{Au}_{5.34}\text{Ag}_{44.66}(\text{Dppm})_6(\text{SR})_{30}$  shows that the  $\text{Ag}_{20}$  kernel of  $\text{Au}_{5.34}\text{Ag}_{44.66}$  is bigger than the  $\text{Ag}_{50}$ ; (D) The bottom view of the half of the  $\text{M}_{32}$  kernel of the  $\text{Au}_{5.34}\text{Ag}_{44.66}(\text{Dppm})_6(\text{SR})_{30}$  shows that the  $\text{Ag}_{12}$  core of  $\text{Au}_{5.34}\text{Ag}_{44.66}$  is smaller than the  $\text{Ag}_{50}$  (color labels: silver/ green= $\text{Ag}$ ; violet= $\text{Ag}/\text{Au}$ )

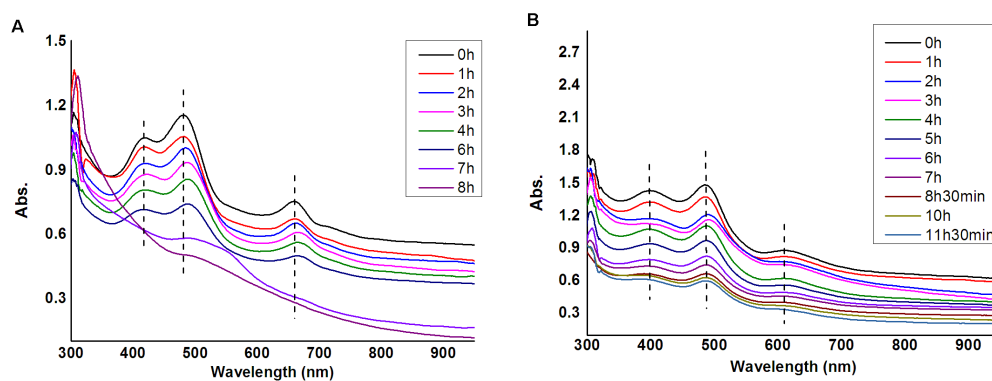

**Figure S4.** Time dependent UV-Vis spectra of (a)  $\text{Ag}_{50}(\text{Dppm})_6(\text{SR})_{30}$  and (b)  $\text{Au}_{5.34}\text{Ag}_{44.66}(\text{Dppm})_6(\text{SR})_{30}$  heated in methanol solution at  $50^\circ\text{C}$ .  $\text{Au}_{5.34}\text{Ag}_{44.66}(\text{Dppm})_6(\text{SR})_{30}$  clusters exhibit a much higher stability than  $\text{Ag}_{50}(\text{Dppm})_6(\text{SR})_{30}$ .

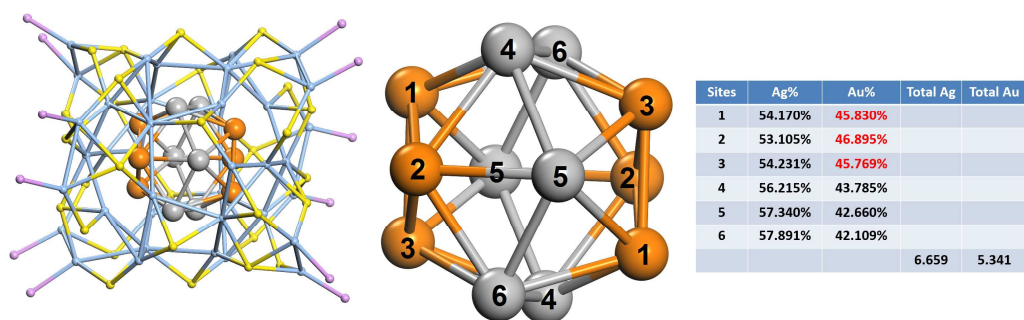

**Figure S5.** The details of the Au occupied atoms in the  $M_{12}$  core of  $Au_xAg_{50-x}(Dppm)_6(SR)_{30}$  ( $M=Au/Ag$ ) (color labels: sky blue=Ag; yellow=S; violet=P; silver= Ag/ Au; brown=Au/Ag).

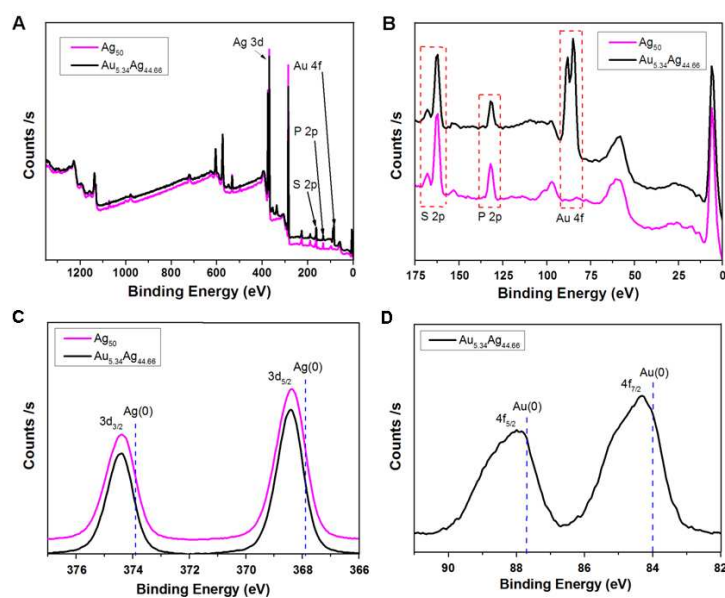

**Figure S6.** The XPS data of the  $M_{5.34}Ag_{44.66}(Dppm)_6(SR)_{30}$  ( $M=Au/Ag$ ) nanoclusters: (A) is the survey data, (B) is the details data of the S 2p, P 2p and Au 4f region, (C) is the Ag 3d region of  $M_{5.34}Ag_{44.66}(Dppm)_6(SR)_{30}$  ( $M=Au/Ag$ ) nanoclusters and bulk Ag (the blue line in C), and (D) is the region of  $Au_{5.34}Ag_{44.66}(Dppm)_6(SR)_{30}$  and bulk Au (the blue line in D).

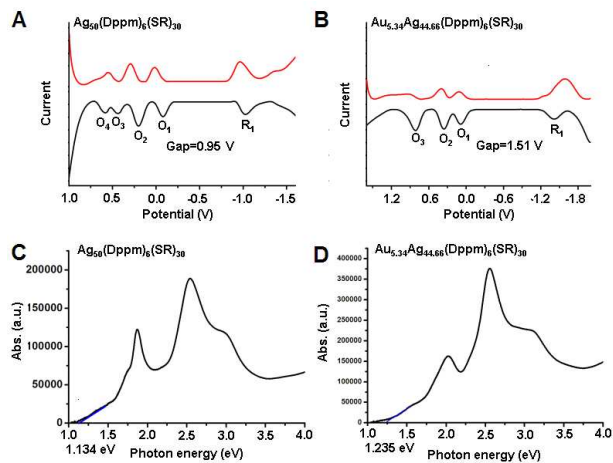

**Figure S7.** The DPVs and photon energies of the  $\text{M}_{5.34}\text{Ag}_{44.66}(\text{Dppm})_6(\text{SR})_{30}$  ( $\text{M}=\text{Au}/\text{Ag}$ ) nanoclusters: (A) is the DPV of  $\text{Ag}_{50}(\text{Dppm})_6(\text{SR})_{30}$  with a gap of 0.95 V, (B) is the DPV of  $\text{Au}_{5.34}\text{Ag}_{44.66}(\text{Dppm})_6(\text{SR})_{30}$  with a gap of 1.51 V, (C) is the photon energy of  $\text{Ag}_{50}(\text{Dppm})_6(\text{SR})_{30}$  with a gap of 1.134 eV, and (D) is the photon energy of  $\text{Au}_{5.34}\text{Ag}_{44.66}(\text{Dppm})_6(\text{SR})_{30}$  with a gap of 1.235 eV.

**Table S1.** Summary peak heights of ESI-MS.

| molecular formula                                          | peak height | proportion | total                                                                                |
|------------------------------------------------------------|-------------|------------|--------------------------------------------------------------------------------------|
| $\text{Au}_4\text{Ag}_{46}(\text{Dppm})_6(\text{SR})_{30}$ | 613.04      | 0.129      |                                                                                      |
| $\text{Au}_5\text{Ag}_{45}(\text{Dppm})_6(\text{SR})_{30}$ | 1872.90     | 0.395      |                                                                                      |
| $\text{Au}_6\text{Ag}_{44}(\text{Dppm})_6(\text{SR})_{30}$ | 1927.98     | 0.407      |                                                                                      |
| $\text{Au}_7\text{Ag}_{43}(\text{Dppm})_6(\text{SR})_{30}$ | 325.95      | 0.069      |                                                                                      |
|                                                            |             |            | <b><math>\text{Au}_{5.42}\text{Ag}_{44.58}(\text{Dppm})_6(\text{SR})_{30}</math></b> |

**Table S2.** Summary of XPS data; all values are in eV.

|                                                                                      | <b>Ag 3d<sub>3/2</sub></b> | <b>Ag 3d<sub>5/2</sub></b> | <b>Au 4f<sub>5/2</sub></b> | <b>Au 4f<sub>7/2</sub></b> |
|--------------------------------------------------------------------------------------|----------------------------|----------------------------|----------------------------|----------------------------|
| <b>Bulk Ag</b>                                                                       | 373.9                      | 367.9                      | --                         | --                         |
| <b>Bulk Au</b>                                                                       | --                         | --                         | 87.7                       | 84.0                       |
| <b><math>\text{Ag}_{50}(\text{Dppm})_6(\text{SR})_{30}</math></b>                    | 374.43                     | 368.42                     | --                         | --                         |
| <b><math>\text{Au}_{5.34}\text{Ag}_{44.66}(\text{Dppm})_6(\text{SR})_{30}</math></b> | 374.45                     | 368.44                     | 87.95                      | 84.30                      |

**Table S3.** The hirshfeld charge analysis (in units of |e|) of Ag(Au), S and P atoms in  $\text{Ag}_{50}(\text{Dppm})_6(\text{SR})_{30}$  and  $\text{Au}_6\text{Ag}_{44}(\text{Dppm})_6(\text{SR})_{30}$

|                                  | Kernel | Ag <sub>20</sub> | Ag <sub>18</sub> | S      | P     |
|----------------------------------|--------|------------------|------------------|--------|-------|
| Ag <sub>50</sub>                 | 0.098  | 1.649            | 2.019            | -3.688 | 2.010 |
| Au <sub>6</sub> Ag <sub>44</sub> | -0.077 | 1.792            | 1.978            | -3.664 | 2.013 |

**Table S4.** The hirshfeld charge analysis (in units of |e|) of kernel in  $\text{Ag}_{50}(\text{Dppm})_6(\text{SR})_{30}$  and  $\text{Au}_6\text{Ag}_{44}(\text{Dppm})_6(\text{SR})_{30}$  clusters.

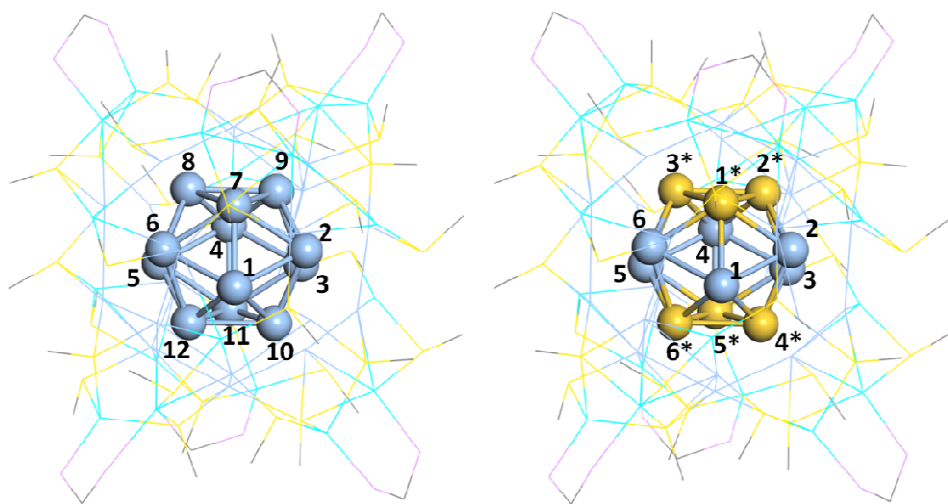

| Ag <sub>50</sub> (Dppm) <sub>6</sub> (SR) <sub>30</sub> |       |       |       |       |       | Au <sub>6</sub> Ag <sub>44</sub> (Dppm) <sub>6</sub> (SR) <sub>30</sub> |        |        |        |        |        |        |
|---------------------------------------------------------|-------|-------|-------|-------|-------|-------------------------------------------------------------------------|--------|--------|--------|--------|--------|--------|
| Ag <sub>50</sub>                                        | 1     | 2     | 3     | 4     | 5     | 6                                                                       | 7      | 8      | 9      | 10     | 11     | 12     |
|                                                         | 0.008 | 0.007 | 0.008 | 0.008 | 0.007 | 0.007                                                                   | 0.010  | 0.011  | 0.008  | 0.008  | 0.009  | 0.007  |
| Au <sub>6</sub> Ag <sub>44</sub>                        | 1     | 2     | 3     | 4     | 5     | 6                                                                       | 1*     | 2*     | 3*     | 4*     | 5*     | 6*     |
|                                                         | 0.017 | 0.018 | 0.017 | 0.018 | 0.017 | 0.018                                                                   | -0.031 | -0.031 | -0.030 | -0.030 | -0.030 | -0.030 |
